# Supplementary material for: NOP53 undergoes liquid-liquid phase separation and promotes tumor radio-resistance
Source: PubMed Central journal article supplement (PMC9622906; doi:10.1038/s41420-022-01226-8), 2022-10-31

Original image: Figure 1E

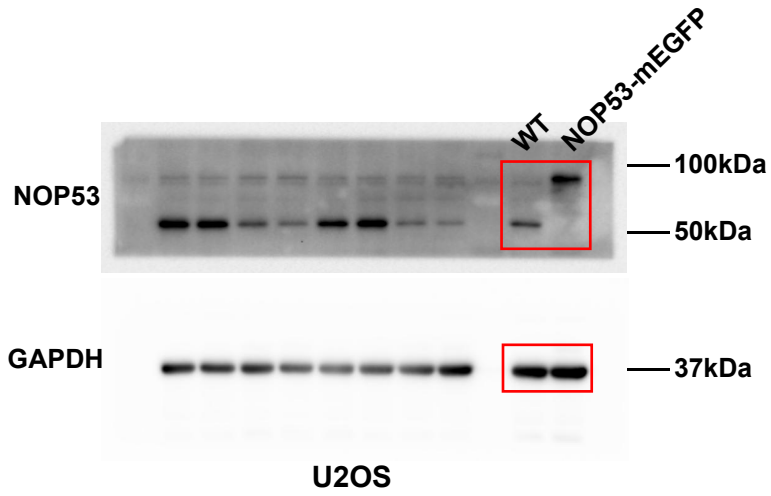

Original image: Figure 5C

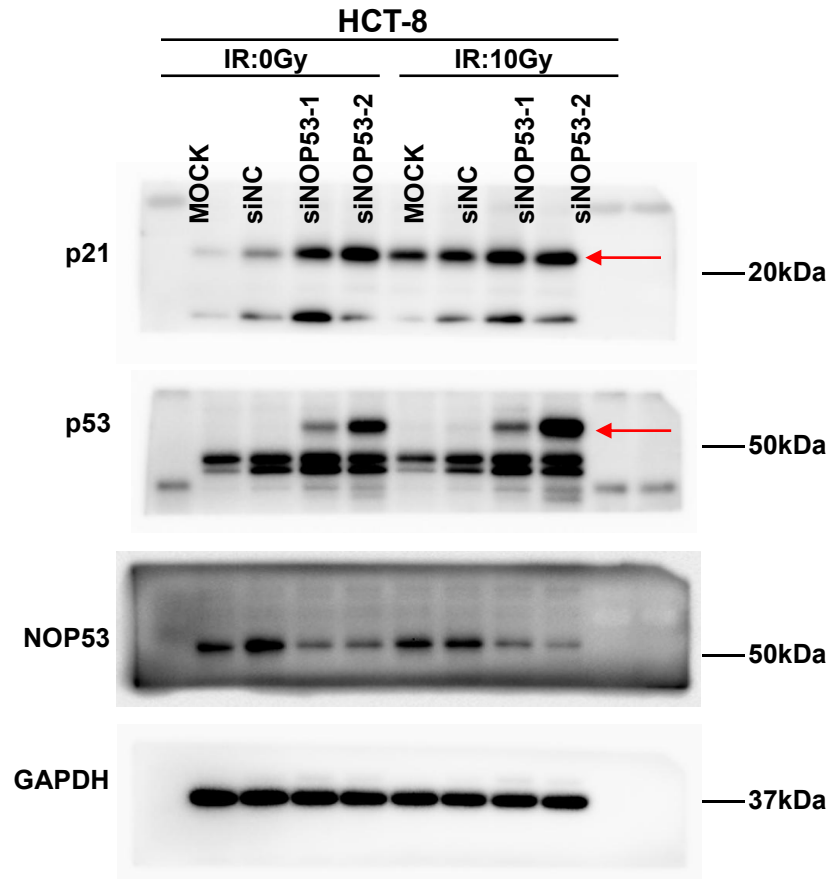

Original image: Figure 5E

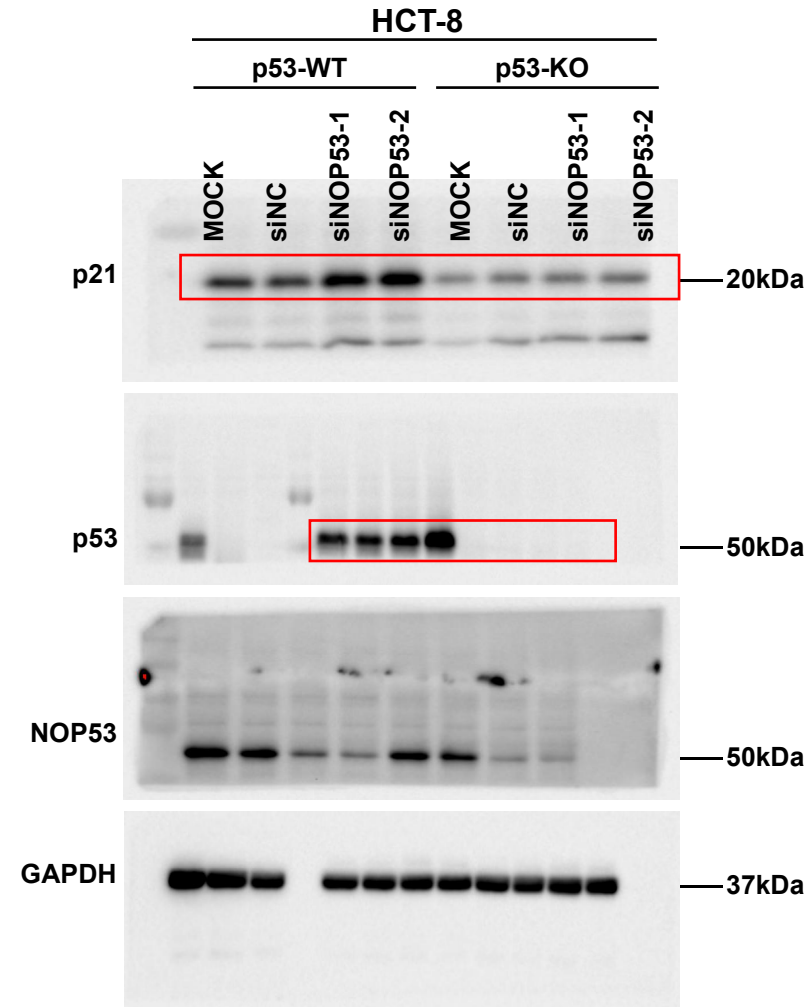

Original image: Supplementary Figure 5A

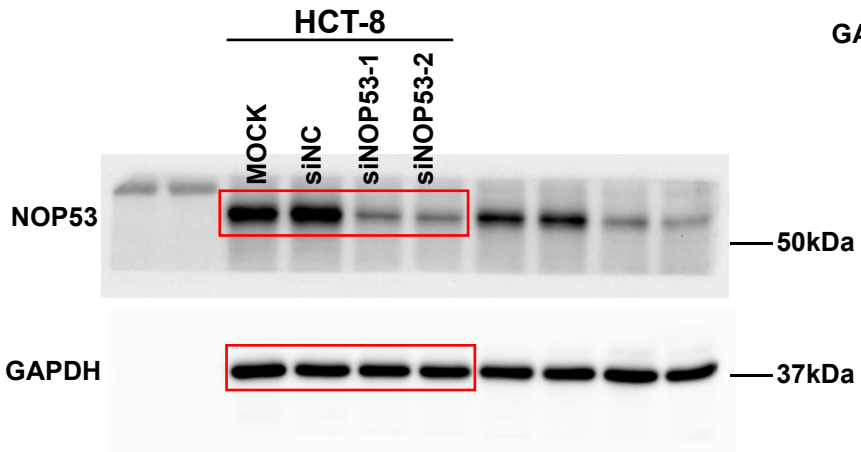

Supplement: 41420_2022_1226_MOESM3_ESM.pdf [file 41420_2022_1226_MOESM3_ESM.pdf]
